# Supplementary material for: Thermal Liquid Biopsy (TLB): A Predictive Score Derived from Serum Thermograms as a Clinical Tool for Screening Lung Cancer Patients
Source: PubMed Central journal article supplement (PMC6678750; doi:10.3390/cancers11071012), 2019-07-19
Supplement: cancers-11-01012-s001.pdf [file cancers-11-01012-s001.pdf]

# Supplementary Materials: Thermal Liquid Biopsy (TLB): A predictive score derived from serum thermograms as a clinical tool for screening lung cancer patients

Alberto Rodrigo, Jorge L. Ojeda, Sonia Vega, Oscar Sanchez-Gracia, Angel Lanas, Dolores Isla, Adrian Velazquez-Campoy and Olga Abian

Table S1. Main descriptive measures for the 14 TLB-derived parameters.

| HC Group          | Minimum | Q1     | Q2     | Average | Q3     | Maximum |
|-------------------|---------|--------|--------|---------|--------|---------|
| T <sub>av</sub>   | 65.93   | 67.59  | 67.95  | 67.98   | 68.39  | 69.08   |
| G <sub>1</sub>    | -0.3757 | 0.1333 | 0.2588 | 0.2330  | 0.3521 | 0.7714  |
| AUC <sub>n2</sub> | 7.011   | 19.86  | 26.89  | 36.92   | 43.66  | 201.7   |
| AP <sub>n2</sub>  | 0.2438  | 0.6233 | 1.127  | 3.598   | 2.762  | 81.29   |
| AUC <sub>n3</sub> | 14.98   | 20.39  | 22.76  | 24.02   | 25.94  | 76.84   |
| AP <sub>n3</sub>  | 0.2934  | 0.5914 | 0.8038 | 0.9215  | 1.016  | 4.343   |
| AUC <sub>n4</sub> | 2.882   | 28.69  | 39.55  | 43.90   | 51.97  | 148.2   |
| AP <sub>n4</sub>  | 0.07751 | 1.457  | 2.416  | 3.232   | 4.028  | 16.24   |
| AUC <sub>n5</sub> | 22.06   | 39.20  | 43.20  | 49.67   | 50.93  | 143.8   |
| AP <sub>n5</sub>  | 0.2949  | 2.265  | 2.876  | 4.203   | 4.148  | 33.44   |
| DV <sub>2</sub>   | 0.9857  | 1.057  | 1.190  | 3.244   | 1.867  | 71.43   |
| DV <sub>3</sub>   | 0.9855  | 1.008  | 1.043  | 1.175   | 1.121  | 5.101   |
| DV <sub>4</sub>   | 0.9861  | 1.043  | 1.173  | 1.443   | 1.375  | 6.069   |
| DV <sub>5</sub>   | 0.9825  | 1.003  | 1.035  | 1.377   | 1.160  | 10.93   |

  

| LCP Group         | Minimum | Q1     | Q2     | Average | Q3     | Maximum |
|-------------------|---------|--------|--------|---------|--------|---------|
| T <sub>av</sub>   | 65.04   | 67.79  | 68.16  | 68.23   | 68.71  | 70.63   |
| G <sub>1</sub>    | -0.1058 | 0.2899 | 0.4436 | 0.4518  | 0.5662 | 3.622   |
| AUC <sub>n2</sub> | 7.011   | 18.72  | 24.20  | 29.82   | 36.15  | 98.32   |
| AP <sub>n2</sub>  | 0.0952  | 0.4884 | 0.9303 | 1.924   | 1.902  | 20.61   |
| AUC <sub>n3</sub> | 8.830   | 21.59  | 25.76  | 34.63   | 33.09  | 263.71  |
| AP <sub>n3</sub>  | 0.2049  | 0.7416 | 0.9723 | 2.145   | 1.551  | 29.33   |
| AUC <sub>n4</sub> | 4.842   | 25.74  | 33.30  | 122.7   | 46.76  | 8098.0  |
| AP <sub>n4</sub>  | 0.2855  | 0.9898 | 1.619  | 261.2   | 3.508  | 28790   |
| AUC <sub>n5</sub> | 18.95   | 36.73  | 47.69  | 101.8   | 63.12  | 1858    |
| AP <sub>n5</sub>  | 0.1778  | 2.150  | 3.120  | 152.3   | 6.294  | 8070    |
| DV <sub>2</sub>   | 0.9857  | 1.094  | 1.204  | 1.909   | 1.393  | 17.32   |

|     |        |       |       |       |       |       |
|-----|--------|-------|-------|-------|-------|-------|
| Dv3 | 0.9855 | 1.014 | 1.072 | 2.562 | 1.509 | 35.50 |
| Dv4 | 0.9861 | 1.081 | 1.184 | 3.872 | 1.333 | 149.7 |
| Dv5 | 0.9825 | 1.025 | 1.197 | 3.644 | 1.480 | 85.04 |

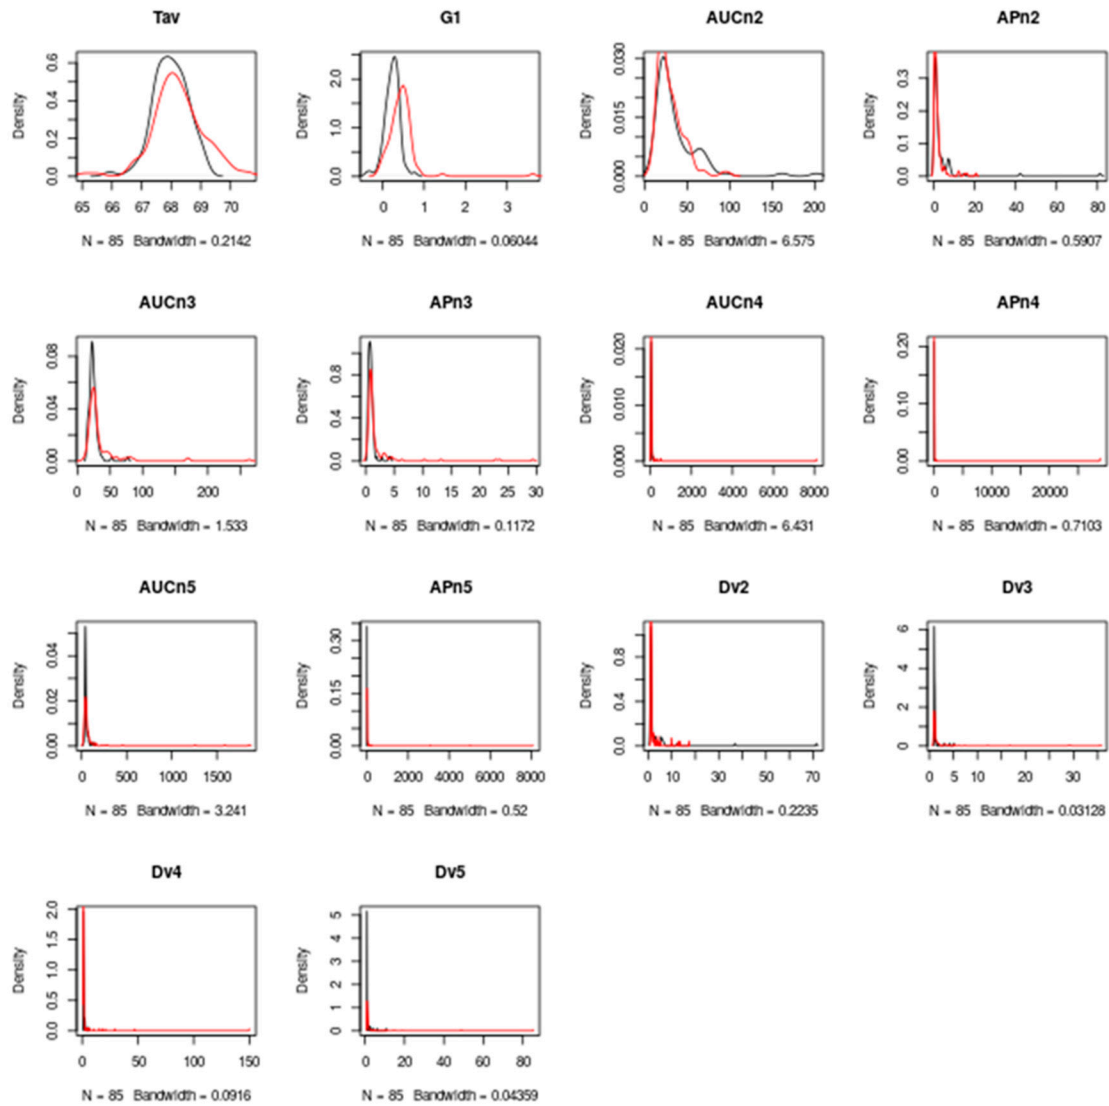

**Figure S1.** Non-parametric density estimators for the 14 individual TLB-derived parameters. HC group (black) / LCP group (red).

**Table S2.** Comparative study of the performance of GLM, LDA, SVM, and NBC on the three models.

|                | Parameter | Success rate | Sensitivity | Specificity |
|----------------|-----------|--------------|-------------|-------------|
| <b>Model 1</b> | GLM       | 88           | 89          | 87          |
|                | LDA       | 84           | 88          | 79          |
|                | SVM       | 90           | 87          | 95          |
|                | NBC       | 55           | 24          | 98          |
| <b>Model 2</b> | Parameter | Success rate | Sensitivity | Specificity |

|  |     |    |    |    |
|--|-----|----|----|----|
|  | GLM | 69 | 73 | 65 |
|  | LDA | 58 | 96 | 6  |
|  | SVM | 61 | 97 | 13 |
|  | NBC | 55 | 25 | 96 |

|                | Parameter | Success rate | Sensitivity | Specificity |
|----------------|-----------|--------------|-------------|-------------|
| <b>Model 3</b> | GLM       | 91           | 90          | 92          |
|                | LDA       | 85           | 88          | 81          |
|                | SVM       | 90           | 88          | 96          |
|                | NBC       | 56           | 25          | 96          |

Four statistical tools (GLM, LDA, SVM, and NBC) were employed for classifying subjects into healthy and diseased individuals using the three models: 1) model 1 with  $T_{av}$ ,  $G_1$ ,  $AUC_{ni}$ , and  $AP_{ni}$ ; 2) model 2 with  $Dv_i$ ; and 3) model 3 with all 14 parameters.

**Table S3.** PS score vs gender & age ( $p$ -value from Kruskal-Wallis test).

| Gender | Healthy Controls |        |        |        |            | Lung Cancer Patients |        |        |        |            |
|--------|------------------|--------|--------|--------|------------|----------------------|--------|--------|--------|------------|
|        | N                | Q1     | Q2     | Q3     | $p$ -Value | N                    | Q1     | Q2     | Q3     | $p$ -Value |
| Men    | 45               | 0.7649 | 0.8776 | 0.9380 | 0.4542     | 95                   | 0.0075 | 0.0450 | 0.1681 | 0.6620     |
| Women  | 40               | 0.6448 | 0.8722 | 0.9515 |            | 19                   | 0.0101 | 0.0457 | 0.2632 |            |

| Age     | Healthy Controls |        |        |        |            | Lung Cancer Patients |        |        |        |            |
|---------|------------------|--------|--------|--------|------------|----------------------|--------|--------|--------|------------|
|         | N                | Q1     | Q2     | Q3     | $p$ -Value | N                    | Q1     | Q2     | Q3     | $p$ -Value |
| < 40    | 34               | 0.7022 | 0.8699 | 0.9343 | 0.8498     | 0                    |        |        |        | 0.2133     |
| 40 - 50 | 17               | 0.7706 | 0.8692 | 0.9062 |            | 10                   | 0.0120 | 0.0443 | 0.0879 |            |
| 50 - 60 | 17               | 0.6528 | 0.8707 | 0.9035 |            | 22                   | 0.0090 | 0.1574 | 0.4478 |            |
| 60 - 70 | 17               | 0.5411 | 0.8883 | 0.9713 |            | 54                   | 0.0114 | 0.0423 | 0.1564 |            |
| 70 -    | 0                |        |        |        |            | 28                   | 0.0003 | 0.0309 | 0.1375 |            |

**Table S4.** PS score vs. clinical history information ( $p$ -value from Kruskal-Wallis test).

| Diagnostic                     | Lung Cancer Patients |        |        |        |            |
|--------------------------------|----------------------|--------|--------|--------|------------|
|                                | N                    | Q1     | Q2     | Q3     | $p$ -Value |
| Adenocarcinoma                 | 43                   | 0.0166 | 0.0672 | 0.2046 | 0.2943     |
| Squamous cell carcinoma        | 32                   | 0.0040 | 0.0301 | 0.0899 |            |
| Small cell carcinoma           | 35                   | 0.0078 | 0.0324 | 0.1739 |            |
| Other non-small cell carcinoma | 4                    | 0.0223 | 0.0823 | 0.3456 |            |

  

| Stage | Lung Cancer Patients |        |        |        |            |
|-------|----------------------|--------|--------|--------|------------|
|       | N                    | Q1     | Q2     | Q3     | $p$ -Value |
| II    | 6                    | 0.0008 | 0.0456 | 0.0923 | 0.4278     |
| III   | 30                   | 0.0096 | 0.0334 | 0.1169 |            |
| IV    | 78                   | 0.0079 | 0.0566 | 0.1964 |            |

  

| Treatment | Lung Cancer Patients |    |    |    |            |
|-----------|----------------------|----|----|----|------------|
|           | N                    | Q1 | Q2 | Q3 | $p$ -Value |

|                             |    |        |        |        |        |
|-----------------------------|----|--------|--------|--------|--------|
| Adjuvant<br>Chemotherapy    | 8  | 0.0018 | 0.0072 | 0.0917 | 0.6424 |
| Neoadjuvant<br>Chemotherapy | 3  | 0.0061 | 0.0113 | 0.1764 |        |
| Palliative<br>Chemotherapy  | 77 | 0.0078 | 0.0546 | 0.1845 |        |
| Radio-<br>Chemotherapy      | 26 | 0.0127 | 0.0412 | 0.1327 |        |

| <b>Lung Cancer Patients</b> |          |           |           |           |                       |
|-----------------------------|----------|-----------|-----------|-----------|-----------------------|
| <b>Response</b>             | <b>N</b> | <b>Q1</b> | <b>Q2</b> | <b>Q3</b> | <b><i>p</i>-Value</b> |
| Stable disease              | 19       | 0.0004    | 0.0133    | 0.0618    | 0.0967                |
| Death                       | 22       | 0.0065    | 0.0648    | 0.2063    |                       |
| Disease<br>progression      | 15       | 0.0468    | 0.1419    | 0.1915    |                       |
| Complete response           | 11       | 0.0038    | 0.0091    | 0.0518    |                       |
| Partial response            | 46       | 0.0246    | 0.0469    | 0.1981    |                       |
